# Supplementary material for: Induced core–shell structure and the electric properties of (K0.48Na0.52)0.95Li0.05Nb0.95Sb0.05O3 ceramics
Source: Royal Society of Chemistry journal article supplement (doi:10.1039/c6cp06111g), 2016-12-12
Supplement: c6cp06111g1.pdf [file c6cp06111g1.pdf]

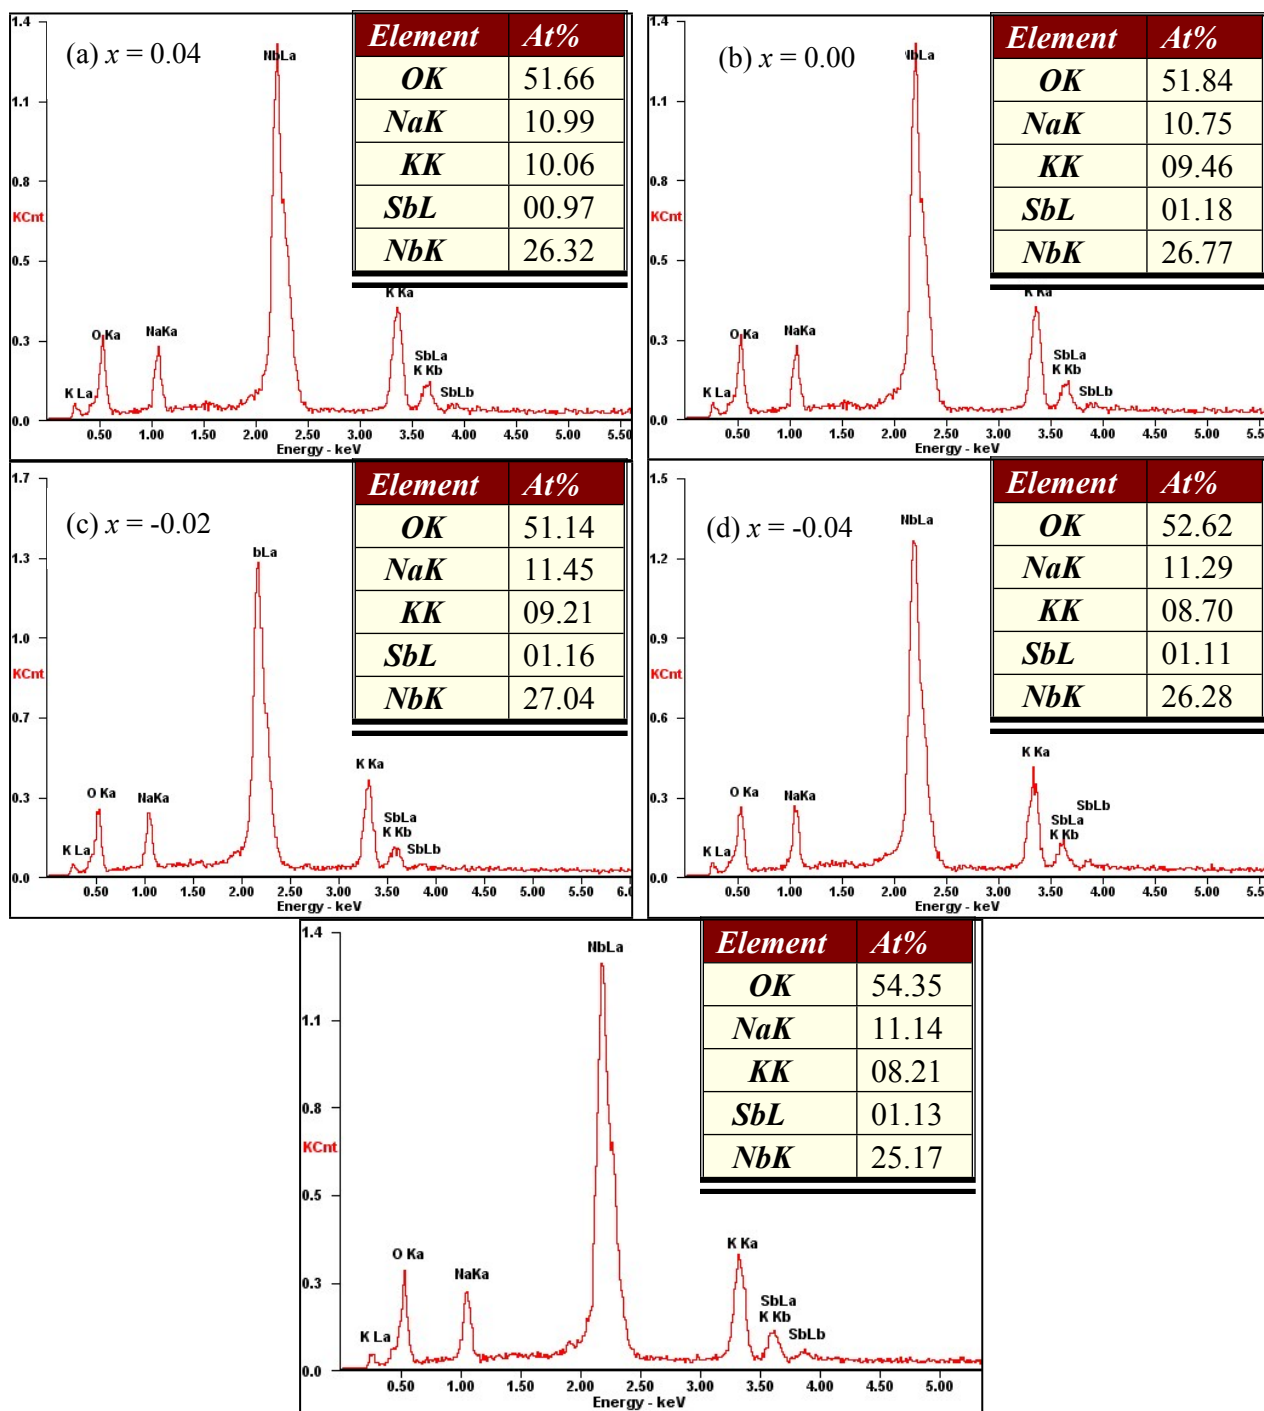

Fig. S1 EDS analysis for (a)  $x = 0.04$ , (b)  $x = 0.00$ , (c)  $x = -0.02$ , (d)  $x = -0.04$  and (e)  $x = -0.08$  ceramics

Figure S1 presents the EDS results of KNLNS ceramics. The atomic ratio of K reduces gradually with the decrease of  $x$ : for the samples with  $x = 0.04$ ,  $0.00$ ,  $-0.02$  and  $-0.04$ , the relative concentrations of K/Nb are about 38.2%, 35.3%, 34.1% and 33.1%, respectively; and the relative concentrations of K/Na are about 91.5%, 88.0%, 80.4% and 77.1%, respectively. Such results correspond to the expectation of the experiment.

| $T(^{\circ}\text{C})$ | $x = 0.04$         |                        |                       |                    |                        |                       | $x = 0.00$         |                        |                       |                    |                        |                       |
|-----------------------|--------------------|------------------------|-----------------------|--------------------|------------------------|-----------------------|--------------------|------------------------|-----------------------|--------------------|------------------------|-----------------------|
|                       | $R_g (\Omega)$     | $C_g (\text{F})$       | $\tau_g$              | $R_{gb} (\Omega)$  | $C_{gb} (\text{F})$    | $\tau_{gb}$           | $R_g (\Omega)$     | $C_g (\text{F})$       | $\tau_g$              | $R_{gb} (\Omega)$  | $C_{gb} (\text{F})$    | $\tau_{gb}$           |
| 300                   | $1.24 \times 10^5$ | $2.92 \times 10^{-9}$  | $3.62 \times 10^{-4}$ | $2.10 \times 10^6$ | $1.11 \times 10^{-9}$  | $2.33 \times 10^{-3}$ | $1.68 \times 10^6$ | $5.61 \times 10^{-10}$ | $9.42 \times 10^{-4}$ | $5.79 \times 10^6$ | $5.94 \times 10^{-10}$ | $3.44 \times 10^{-3}$ |
| 320                   | $1.08 \times 10^5$ | $5.30 \times 10^{-9}$  | $5.70 \times 10^{-4}$ | $2.13 \times 10^6$ | $1.81 \times 10^{-9}$  | $3.86 \times 10^{-3}$ | $6.09 \times 10^5$ | $6.77 \times 10^{-10}$ | $4.12 \times 10^{-4}$ | $3.54 \times 10^6$ | $6.29 \times 10^{-10}$ | $2.23 \times 10^{-3}$ |
| 340                   | $1.85 \times 10^5$ | $4.08 \times 10^{-9}$  | $7.54 \times 10^{-4}$ | $2.62 \times 10^6$ | $1.72 \times 10^{-9}$  | $4.51 \times 10^{-3}$ | $5.12 \times 10^5$ | $7.83 \times 10^{-10}$ | $4.01 \times 10^{-4}$ | $2.77 \times 10^6$ | $8.76 \times 10^{-10}$ | $2.43 \times 10^{-3}$ |
| 360                   | $2.84 \times 10^5$ | $2.39 \times 10^{-9}$  | $6.79 \times 10^{-4}$ | $2.84 \times 10^6$ | $1.30 \times 10^{-9}$  | $3.69 \times 10^{-3}$ | $3.87 \times 10^5$ | $1.64 \times 10^{-9}$  | $6.35 \times 10^{-4}$ | $2.33 \times 10^6$ | $1.64 \times 10^{-9}$  | $3.82 \times 10^{-3}$ |
| 380                   | $2.95 \times 10^5$ | $1.52 \times 10^{-9}$  | $4.48 \times 10^{-4}$ | $2.19 \times 10^6$ | $1.07 \times 10^{-9}$  | $2.34 \times 10^{-3}$ | $2.70 \times 10^5$ | $2.78 \times 10^{-9}$  | $7.51 \times 10^{-4}$ | $1.45 \times 10^6$ | $2.52 \times 10^{-9}$  | $3.65 \times 10^{-3}$ |
| 400                   | $2.43 \times 10^5$ | $9.33 \times 10^{-10}$ | $2.26 \times 10^{-4}$ | $1.45 \times 10^6$ | $8.74 \times 10^{-10}$ | $1.27 \times 10^{-3}$ | $2.78 \times 10^5$ | $1.67 \times 10^{-9}$  | $4.64 \times 10^{-4}$ | $7.85 \times 10^5$ | $1.99 \times 10^{-9}$  | $1.56 \times 10^{-3}$ |
| 420                   | $2.42 \times 10^5$ | $9.30 \times 10^{-10}$ | $2.25 \times 10^{-4}$ | $1.44 \times 10^6$ | $8.70 \times 10^{-10}$ | $1.26 \times 10^{-3}$ | $1.59 \times 10^5$ | $1.19 \times 10^{-9}$  | $1.89 \times 10^{-4}$ | $4.25 \times 10^5$ | $1.88 \times 10^{-9}$  | $7.99 \times 10^{-4}$ |
| 440                   | $1.91 \times 10^4$ | $5.51 \times 10^{-10}$ | $1.05 \times 10^{-5}$ | $8.00 \times 10^5$ | $7.52 \times 10^{-10}$ | $6.02 \times 10^{-4}$ | $8.05 \times 10^4$ | $9.73 \times 10^{-10}$ | $7.83 \times 10^{-4}$ | $2.07 \times 10^5$ | $1.63 \times 10^{-9}$  | $3.37 \times 10^{-4}$ |
| 460                   | $1.58 \times 10^4$ | $4.72 \times 10^{-10}$ | $7.46 \times 10^{-6}$ | $6.26 \times 10^5$ | $6.91 \times 10^{-10}$ | $4.33 \times 10^{-4}$ | $3.78 \times 10^4$ | $8.13 \times 10^{-10}$ | $3.07 \times 10^{-5}$ | $1.07 \times 10^5$ | $1.36 \times 10^{-9}$  | $1.46 \times 10^{-4}$ |
| 480                   | $1.09 \times 10^4$ | $4.37 \times 10^{-10}$ | $4.77 \times 10^{-6}$ | $4.62 \times 10^4$ | $6.44 \times 10^{-10}$ | $2.98 \times 10^{-5}$ | $2.63 \times 10^4$ | $5.07 \times 10^{-10}$ | $1.33 \times 10^{-5}$ | $7.61 \times 10^4$ | $1.14 \times 10^{-9}$  | $8.68 \times 10^{-4}$ |
| $T(^{\circ}\text{C})$ | $x = -0.02$        |                        |                       |                    |                        |                       | $x = -0.04$        |                        |                       |                    |                        |                       |
|                       | $R_g (\Omega)$     | $C_g (\text{F})$       | $\tau_g$              | $R_{gb} (\Omega)$  | $C_{gb} (\text{F})$    | $\tau_{gb}$           | $R_g (\Omega)$     | $C_g (\text{F})$       | $\tau_g$              | $R_{gb} (\Omega)$  | $C_{gb} (\text{F})$    | $\tau_{gb}$           |
| 300                   | $2.71 \times 10^4$ | $2.65 \times 10^{-10}$ | $7.18 \times 10^{-6}$ | $6.46 \times 10^4$ | $1.46 \times 10^{-7}$  | $9.43 \times 10^{-3}$ | $9.75 \times 10^4$ | $3.16 \times 10^{-10}$ | $3.08 \times 10^{-5}$ | $7.35 \times 10^4$ | $4.80 \times 10^{-8}$  | $3.53 \times 10^{-3}$ |
| 320                   | $1.95 \times 10^4$ | $3.08 \times 10^{-10}$ | $6.01 \times 10^{-6}$ | $8.99 \times 10^4$ | $1.66 \times 10^{-7}$  | $1.49 \times 10^{-2}$ | $2.14 \times 10^4$ | $3.06 \times 10^{-10}$ | $6.55 \times 10^{-6}$ | $5.19 \times 10^4$ | $1.46 \times 10^{-7}$  | $7.8 \times 10^{-3}$  |
| 340                   | $1.18 \times 10^4$ | $6.73 \times 10^{-10}$ | $7.91 \times 10^{-6}$ | $1.33 \times 10^5$ | $1.30 \times 10^{-7}$  | $1.73 \times 10^{-2}$ | $1.16 \times 10^3$ | $3.10 \times 10^{-10}$ | $3.60 \times 10^{-6}$ | $4.38 \times 10^4$ | $2.04 \times 10^{-7}$  | $8.94 \times 10^{-3}$ |
| 360                   | $1.07 \times 10^4$ | $3.22 \times 10^{-9}$  | $3.45 \times 10^{-5}$ | $1.20 \times 10^5$ | $1.03 \times 10^{-7}$  | $1.24 \times 10^{-2}$ | $8.01 \times 10^3$ | $4.09 \times 10^{-10}$ | $3.28 \times 10^{-6}$ | $4.22 \times 10^4$ | $2.10 \times 10^{-7}$  | $8.86 \times 10^{-3}$ |
| 380                   | $2.00 \times 10^4$ | $1.81 \times 10^{-9}$  | $3.62 \times 10^{-5}$ | $9.68 \times 10^4$ | $5.32 \times 10^{-8}$  | $5.15 \times 10^{-3}$ | $5.45 \times 10^3$ | $7.30 \times 10^{-10}$ | $3.98 \times 10^{-6}$ | $3.80 \times 10^4$ | $1.95 \times 10^{-7}$  | $7.41 \times 10^{-3}$ |
| 400                   | $3.00 \times 10^4$ | $6.91 \times 10^{-10}$ | $2.07 \times 10^{-5}$ | $4.96 \times 10^4$ | $1.32 \times 10^{-8}$  | $6.55 \times 10^{-4}$ | $4.77 \times 10^3$ | $1.92 \times 10^{-9}$  | $9.16 \times 10^{-6}$ | $2.60 \times 10^4$ | $1.58 \times 10^{-7}$  | $4.11 \times 10^{-3}$ |
| 420                   | $1.60 \times 10^4$ | $6.18 \times 10^{-10}$ | $9.89 \times 10^{-6}$ | $2.59 \times 10^4$ | $1.97 \times 10^{-8}$  | $5.10 \times 10^{-4}$ | $5.99 \times 10^3$ | $1.50 \times 10^{-9}$  | $8.99 \times 10^{-6}$ | $2.08 \times 10^4$ | $1.31 \times 10^{-7}$  | $2.72 \times 10^{-3}$ |
| 440                   | $1.04 \times 10^4$ | $5.23 \times 10^{-10}$ | $5.44 \times 10^{-6}$ | $1.53 \times 10^4$ | $3.04 \times 10^{-8}$  | $4.65 \times 10^{-4}$ | $7.45 \times 10^3$ | $8.91 \times 10^{-10}$ | $6.64 \times 10^{-5}$ | $1.60 \times 10^4$ | $8.32 \times 10^{-8}$  | $1.33 \times 10^{-3}$ |
| 460                   | $6.16 \times 10^3$ | $3.99 \times 10^{-10}$ | $2.46 \times 10^{-6}$ | $8.75 \times 10^3$ | $3.48 \times 10^{-8}$  | $3.05 \times 10^{-4}$ | $6.36 \times 10^3$ | $6.44 \times 10^{-10}$ | $4.10 \times 10^{-6}$ | $1.02 \times 10^4$ | $5.69 \times 10^{-8}$  | $5.80 \times 10^{-4}$ |
| 480                   | $3.71 \times 10^3$ | $3.16 \times 10^{-10}$ | $1.17 \times 10^{-6}$ | $5.49 \times 10^3$ | $2.72 \times 10^{-8}$  | $1.49 \times 10^{-4}$ | $4.67 \times 10^3$ | $5.14 \times 10^{-10}$ | $2.40 \times 10^{-6}$ | $7.20 \times 10^3$ | $3.37 \times 10^{-8}$  | $2.43 \times 10^{-4}$ |

Table S1 Resistance, capacitance and time constant ( $\tau$ , where  $\tau = RC$ ) of grain ( $R_g$ ,  $C_g$ ) and grain boundary ( $R_{gb}$ ,  $C_{gb}$ ) of  $x = 0.04$ ,  $x = 0.00$ ,  $x = -0.02$  and  $x = -0.04$  ceramics after fitting with an electrical circuit shown in Fig. 5a

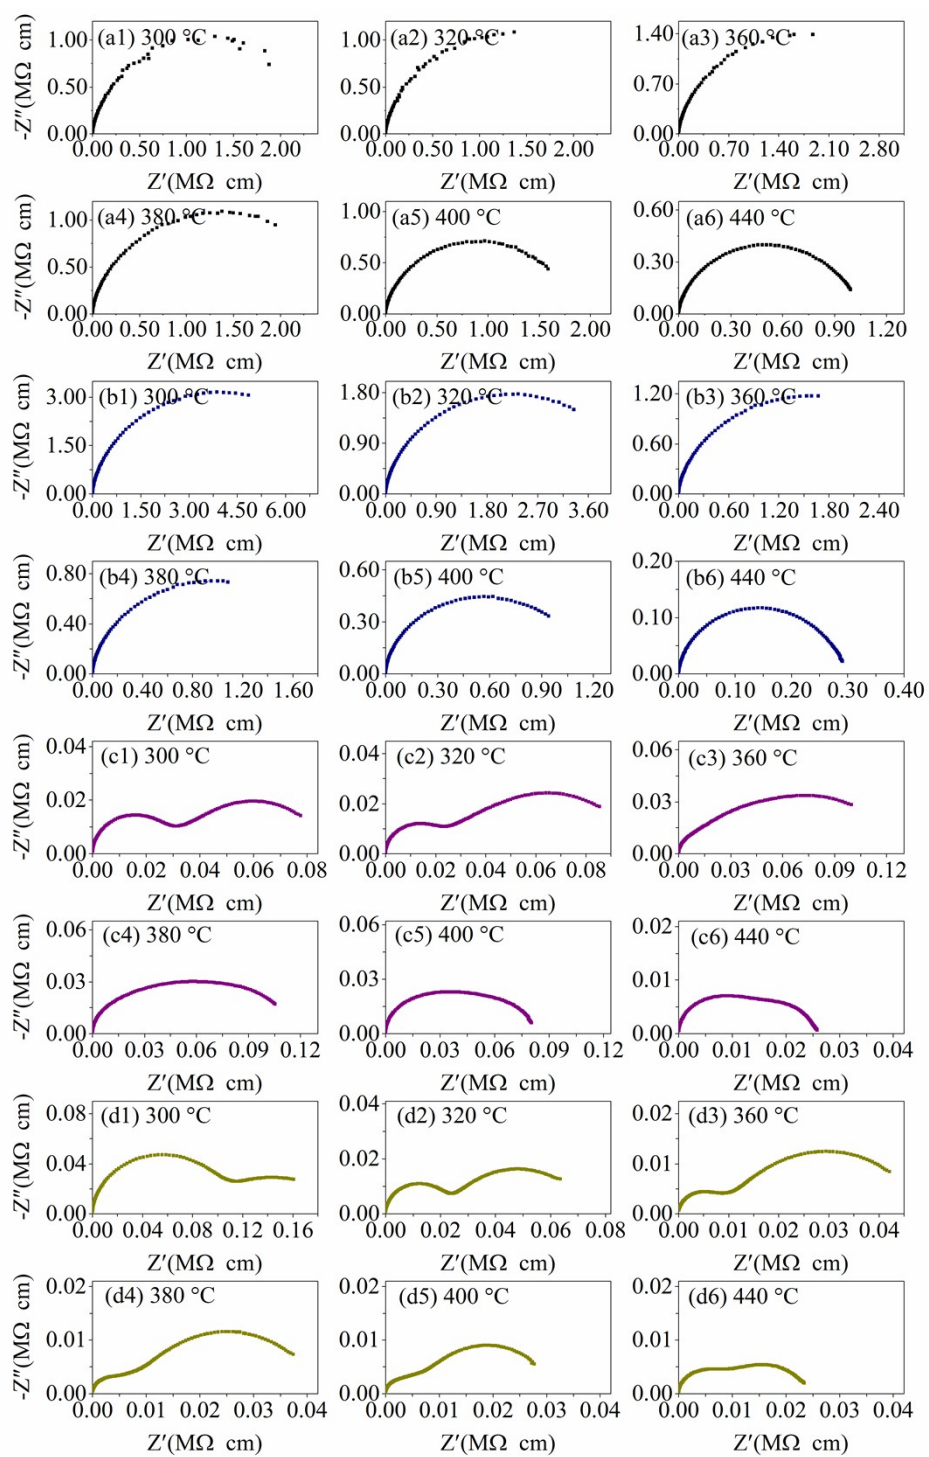

Fig. S2 Impedance complex plane plot at different temperatures for (a)  $x = 0.04$ , (b)  $x = 0.00$ , (c)  $x = -0.02$  and (d)  $x = -0.04$  ceramics
